# Supplementary material for: Design of jacket lifting and hang-off point for the Seesaw barge jacket removal concept
Source: Royal Society of Chemistry journal article supplement (doi:10.1039/d0ra02343d), 2001-11-30
Supplement: d0ra02343d1.pdf [file d0ra02343d1.pdf]

## Electron-Phonon scattering and excitonic effects in T-carbon

Xiangtian Bu, Shudong Wang\*

School of Physical Science and Technology, Inner Mongolia University, Hohhot

010021, China

1. The band structures of T-carbon with  $G_0W_0$  and LDA.

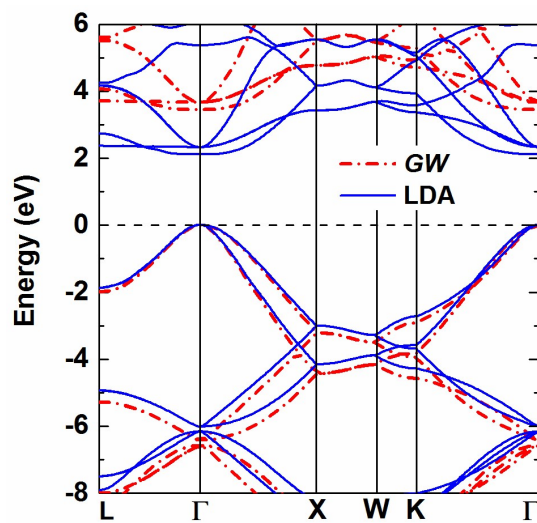

Fig. S1: The  $G_0W_0$  and LDA band structures of T-carbon.
